# Supplementary material
Source: PubMed Central journal article supplement (PMC3557544)
Supplement: NIHMS416312-supplement-01.pdf [file NIHMS416312-supplement-01.pdf]

**Supplemental Table 1: Pairwise Group Differences in Callosal Volume (Unadjusted for ICV)**

|                  | Pairwise Group differences in volume (height) at average age (17.31) |           |                |            |           |                |            |           |          | Pairwise Group differences in trajectory (slope) |           |          |            |           |          |            |           |          |
|------------------|----------------------------------------------------------------------|-----------|----------------|------------|-----------|----------------|------------|-----------|----------|--------------------------------------------------|-----------|----------|------------|-----------|----------|------------|-----------|----------|
|                  | COS vs. SIB                                                          |           |                | COS vs. NV |           |                | SIB vs. NV |           |          | COS vs. SIB                                      |           |          | COS vs. NV |           |          | SIB vs. NV |           |          |
|                  | <i>F</i>                                                             | <i>df</i> | <i>P</i>       | <i>F</i>   | <i>df</i> | <i>P</i>       | <i>F</i>   | <i>df</i> | <i>P</i> | <i>F</i>                                         | <i>df</i> | <i>P</i> | <i>F</i>   | <i>df</i> | <i>P</i> | <i>F</i>   | <i>df</i> | <i>P</i> |
| CC Posterior     | 0.2                                                                  | 1,362     | 0.6581         | 0.4        | 1,362     | 0.5254         | 0.85       | 1,362     | 0.3565   | 0.2                                              | 3,362     | 0.8957   | 0.36       | 3,362     | 0.7842   | 0.12       | 3,362     | 0.9502   |
| CC Mid-Posterior | 7.41                                                                 | 1,363     | <b>0.0068*</b> | 3.35       | 1,363     | 0.0678         | 0.6        | 1,363     | 0.4398   | 0.45                                             | 3,363     | 0.7146   | 2.05       | 3,363     | 0.1064   | 0.32       | 3,363     | 0.8141   |
| CC Central       | 2.91                                                                 | 1,363     | 0.0892         | 7.16       | 1,363     | <b>0.0078*</b> | 0.56       | 1,363     | 0.4547   | 1.96                                             | 3,363     | 0.1193   | 0.87       | 3,363     | 0.4583   | 0.99       | 3,363     | 0.3954   |
| CC Mid-Anterior  | 0.18                                                                 | 1,366     | 0.6704         | 0.75       | 1,366     | 0.693          | 0.16       | 1,366     | 0.693    | 0.77                                             | 2,366     | 0.4626   | 0.2        | 2,366     | 0.8169   | 0.3        | 2,366     | 0.7412   |
| CC Anterior      | 0.17                                                                 | 1,366     | 0.681          | 0.2        | 1,366     | 0.651          | 0          | 1,366     | 0.961    | 0.1                                              | 2,366     | 0.905    | 0.22       | 2,366     | 0.799    | 0.27       | 2,366     | 0.766    |
| CC Total         | 0                                                                    | 1,362     | 0.9991         | 0          | 1,362     | 0.9865         | 0          | 1,362     | 0.9868   | 0.95                                             | 3,362     | 0.4159   | 0.05       | 3,362     | 0.9863   | 1.27       | 3,362     | 0.2839   |

COS= Childhood-Onset Schizophrenia probands; NV= healthy comparison subjects; SIB= healthy siblings of Childhood-Onset Schizophrenia probands

Data were covaried for gender at the mean centered age (17.31 years [SD=4.66]).

\* None of the results survived correction for multiple comparisons
